# Supplementary material for: Relationship of High-Density Lipoprotein-Associated Arylesterase Activity to Systolic Heart Failure in Patients with and without Type 2 Diabetes
Source: PubMed Central journal article supplement (PMC6461629; doi:10.1038/s41598-019-42518-x), 2019-04-12
Supplement: 41598_2019_42518_MOESM1_ESM.pdf [file 41598_2019_42518_MOESM1_ESM.pdf]

**Relationship of High-Density Lipoprotein-Associated Arylesterase Activity to Systolic Heart Failure in Patients with and without Type 2 Diabetes**

Chang Li, MD, PhD<sup>1,2</sup>; Jia Wei Chen, MD<sup>1,2</sup>; Feng Hua Ding, MD, PhD<sup>1</sup>; Ying Shen, MD, PhD<sup>1</sup>; Zhu Hui Liu, PhD<sup>1,2</sup>; Fang Wang, MD<sup>1</sup>; Rui Yan Zhang, MD, PhD<sup>1</sup>; Wei Feng Shen, MD, PhD<sup>1,2</sup>; Lin Lu, MD, PhD<sup>1,2\*</sup>; Xiao Qun Wang, MD, PhD<sup>1,2\*</sup>

**Online Supplements**

## Supplementary table

**Supplementary Table 1. Arylesterase activity in diabetic and non-diabetic patients with or without heart failure**

|                       | Non-diabetic patients |                | Diabetic patients |                | Diabetes         | HF               | Diabetes × HF    |
|-----------------------|-----------------------|----------------|-------------------|----------------|------------------|------------------|------------------|
|                       | No HF (n=189)         | HF (n=137)     | No HF (n=74)      | HF (n=79)      | <i>P</i> 1-value | <i>P</i> 2-value | <i>P</i> 3-value |
| Arylesterase activity | 199.78 ± 70.51        | 166.97 ± 49.19 | 179.44 ± 61.40    | 140.15 ± 45.88 | <0.001           | <0.001           | 0.559            |

Values are given as mean ± standard deviation. P1, P2, and P3 values stand for the contributions of diabetes, HF, and diabetes × HF interaction to the differences of biological analytes among the four groups by two-way analysis of variance, respectively.

**Supplementary Table 2. Arylesterase activity in diabetic and non-diabetic patients with heart failure according to different aetiology**

|                       | Ischemic cardiomyopathy (ICM) |                 | Dilated cardiomyopathy (DCM) |                    | Diabetes         | Aetiology        | Diabetes ×<br>aetiology |
|-----------------------|-------------------------------|-----------------|------------------------------|--------------------|------------------|------------------|-------------------------|
|                       | Non-diabetes (n=63)           | Diabetes (n=42) | Non-diabetes (n=74)          | Diabetes<br>(n=37) | <i>P</i> 1-value | <i>P</i> 2-value | <i>P</i> 3-value        |
| Arylesterase activity | 167.56 ± 45.67                | 140.60 ± 44.57  | 166.47 ± 52.30               | 139.65 ± 47.94     | <0.001           | 0.881            | 0.992                   |

Values are given as mean ± standard deviation. *P*1, *P*2, and *P*3 values stand for the contributions of diabetes, aetiology, and diabetes × aetiology interaction to the differences of biological analytes among the four groups by two-way analysis of variance, respectively.
